# Supplementary material for: A feasibility study of multi-site,intracellular recordings from mammalian neurons by extracellular gold mushroom-shaped microelectrodes
Source: PubMed Central journal article supplement (PMC4568476; doi:10.1038/srep14100), 2015-09-14
Supplement: srep14100-s1.pdf [file srep14100-s1.pdf]

**A feasibility study of multi-site, intracellular recordings from mammalian neurons by extracellular gold mushroom-shaped microelectrodes**

Silviya M. Ojovan<sup>1</sup>, Noha Rabieh<sup>1</sup>, Nava Shmoel<sup>1</sup>, Hadas Erez<sup>1</sup>, Eilon Maydan<sup>1</sup>, Ariel Cohen<sup>2</sup> and Micha E. Spira<sup>1\*</sup>

**1 Supplementary Figures 1-4**

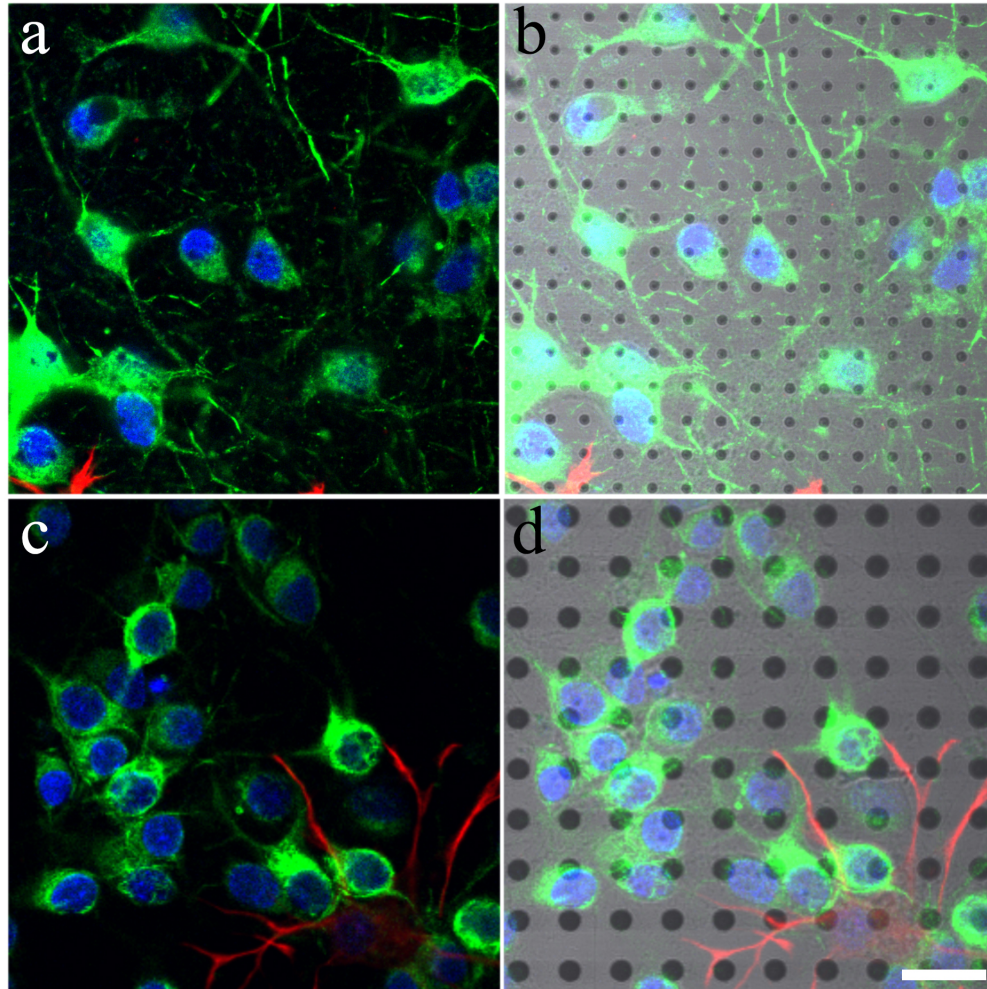

**Supplementary Figure 1.** . Confocal images of primary hippocampal neurons grown on matrices of gold mushroom-shaped protruding microstructures (gM $\mu$ Ps) for 7 days. Note that the density of glial cells (red) is low (3%) increasing the probability of the neurons (green) to form direct contacts with the gM $\mu$ Ps. (a) and (b) neurons grown on matrices of small gM $\mu$ Ps, (c) and (d) neurons grown on large gM $\mu$ Ps. (a) and (c) images of immunolabeled cells only, (b) and (d) superimposed light and fluorescent microscope images of the gM $\mu$ Ps matrices and the fluorescently labeled cells. Calibration bar - 20 $\mu$ m.

**A feasibility study of multi-site, intracellular recordings from mammalian neurons by extracellular gold mushroom-shaped microelectrodes**

Silviya M. Ojovan<sup>1</sup>, Noha Rabieh<sup>1</sup>, Nava Shmoel<sup>1</sup>, Hadas Erez<sup>1</sup>, Eilon Maydan<sup>1</sup>, Ariel Cohen<sup>2</sup> and Micha E. Spira<sup>1\*</sup>

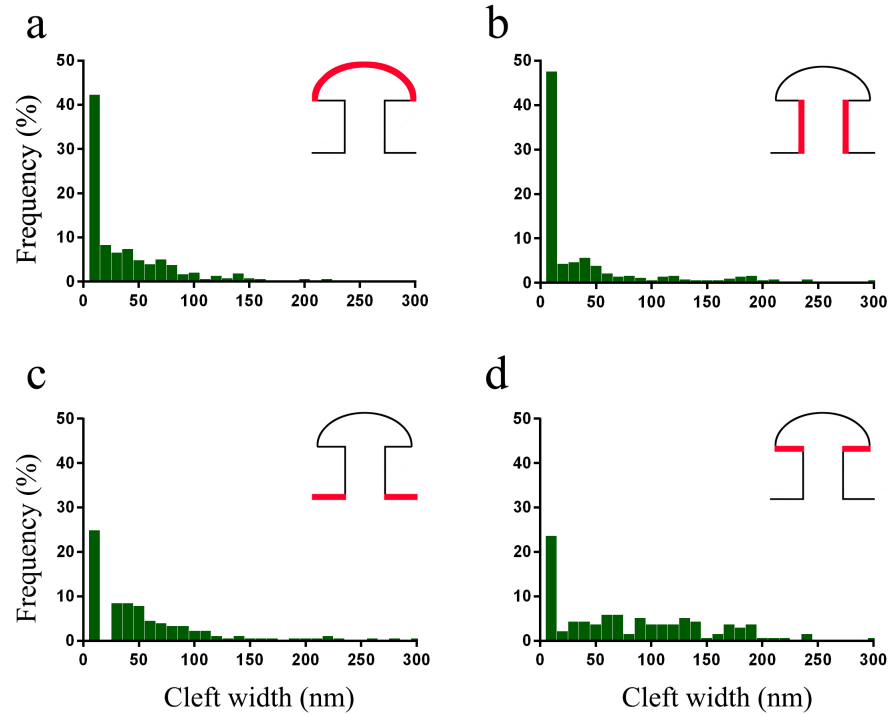

**Supplementary Figure 2.** The frequency (%) of different cleft widths (nm) formed between the surface of small gMμPs and the neuron's plasma membrane. The cleft width was measured in 4 different compartments (marked in red) of the gMμPs: (a) the cap surface that faces the junctional membrane; (b) the surface of the stalk; (c) the substrate; and (d) the surface under mushroom cap.

**A feasibility study of multi-site, intracellular recordings from mammalian neurons by extracellular gold mushroom-shaped microelectrodes**

Silviya M. Ojovan<sup>1</sup>, Noha Rabieh<sup>1</sup>, Nava Shmoel<sup>1</sup>, Hadas Erez<sup>1</sup>, Eilon Maydan<sup>1</sup>, Ariel Cohen<sup>2</sup> and Micha E. Spira<sup>1\*</sup>

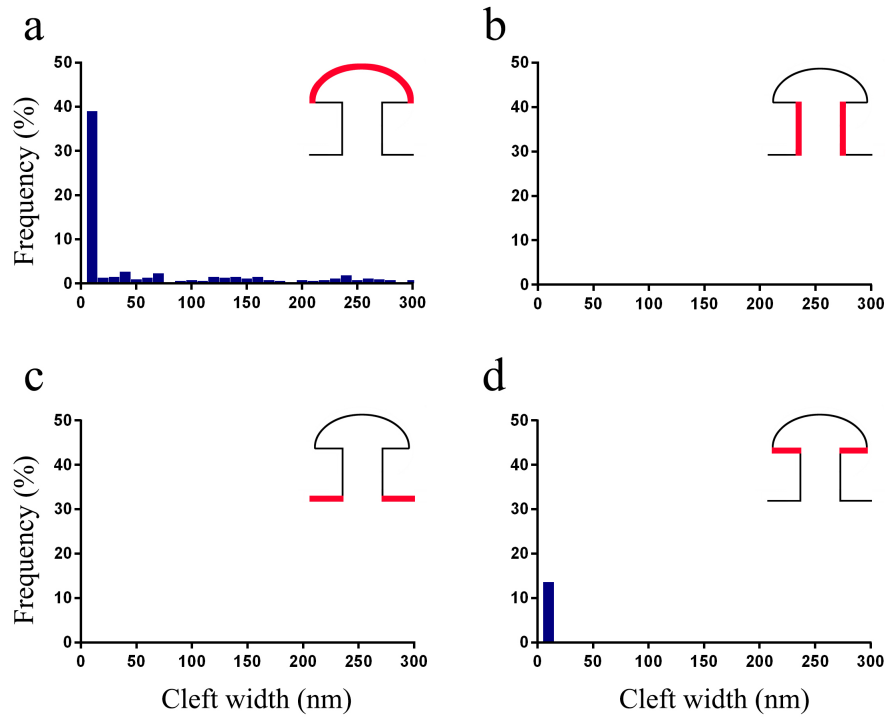

**Supplementary Figure 3.** The same as Supplementary Figure 2 but for a medium size gM $\mu$ Ps.

**A feasibility study of multi-site, intracellular recordings from mammalian neurons by extracellular gold mushroom-shaped microelectrodes**

Silviya M. Ojovan<sup>1</sup>, Noha Rabieh<sup>1</sup>, Nava Shmoel<sup>1</sup>, Hadas Erez<sup>1</sup>, Eilon Maydan<sup>1</sup>, Ariel Cohen<sup>2</sup> and Micha E. Spira<sup>1\*</sup>

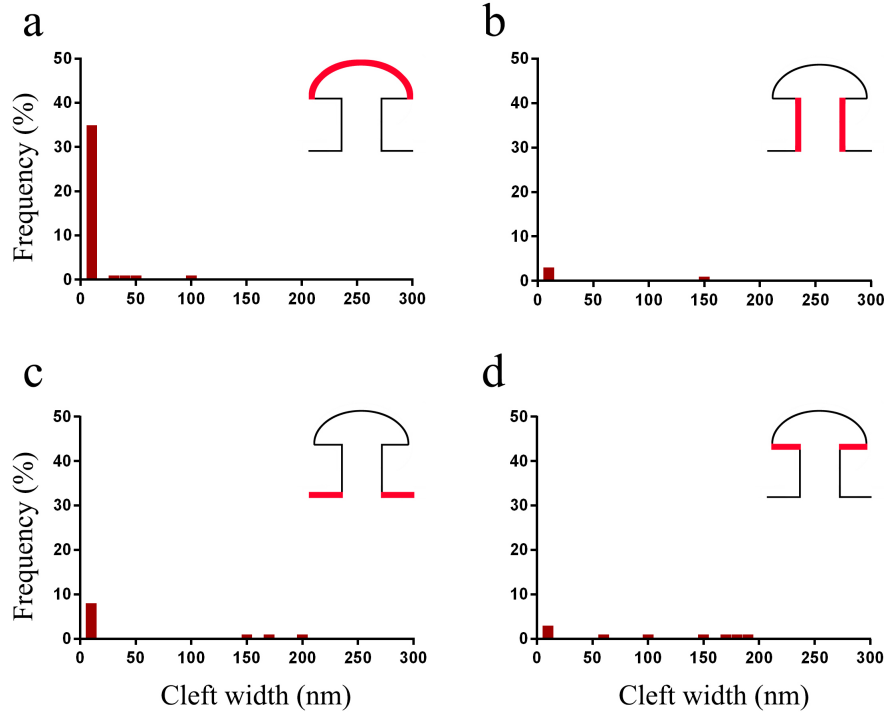

**Supplementary Figure 4.** The same as Supplementary Figure 2 but for a large size gM $\mu$ Ps

## 2 Calculation of parameters used in the simulations

To define the electrical properties of the gM $\mu$ E and the junctional membrane, we first calculated the gM $\mu$ E surface area (2.1) and then derived their electrical characteristics (2.2).

### 2.1 gM $\mu$ E surface area

The surface area of a gM $\mu$ E is the sum of the hemi-ellipsoid cap (the upper surface of the cap), the flat part of the gM $\mu$ E under the mushroom cap and the stalk (Supplementary Figure 2.). The surface area of an ellipsoid is given approximately by-

$$S \approx 4\pi \left( \frac{(ab)^{1.6} + (ac)^{1.6} + (bc)^{1.6}}{3} \right)^{\frac{1}{1.6}} \quad (1)$$

where a,b,c are the ellipsoid semi-axis lengths. Therefore the surface area of half of an ellipsoid with two identical semi-axis lengths  $r_{cap}$  (the gM $\mu$ E cap radius),

**A feasibility study of multi-site, intracellular recordings from mammalian neurons by extracellular gold mushroom-shaped microelectrodes**

Silviya M. Ojovan<sup>1</sup>, Noha Rabieh<sup>1</sup>, Nava Shmoel<sup>1</sup>, Hadas Erez<sup>1</sup>, Eilon Maydan<sup>1</sup>, Ariel Cohen<sup>2</sup> and Micha E. Spira<sup>1\*</sup>

and with the third being  $h_{cap}$ (the height of the cap) is-

$$S \approx \frac{1}{2} \cdot 4\pi \left( \frac{(r_{cap} \cdot r_{cap})^{1.6} + (r_{cap}h_{cap})^{1.6} + (h_{cap}r_{cap})^{1.6}}{3} \right)^{\frac{1}{1.6}} \quad (2)$$

The simulations assumed constant  $h_{cap}$  of  $0.5\mu m$ .

The flat area at the bottom of the gM $\mu$ E cap is given by subtraction of the area occupied by the stalk with a radius of  $r_{stalk}$  from the the flat area at the botom of the gM $\mu$ E cap with radius  $r_{cap}$ .

$$S_{bottom} = \pi r_{cap}^2 - \pi r_{stalk}^2 = \pi (r_{cap}^2 - r_{stalk}^2) \quad (3)$$

The surface area of the stalk is given by-

$$S_{stalk} = 2\pi r_{stalk} h_{stalk} \quad (4)$$

The sum of these is-

$$\begin{aligned} S_{gM\mu E} &= S_{cap} + S_{bottom} + S_{stalk} \quad (5) \\ &= 2\pi \left( \frac{r_{cap}^{3.2} + 1.65 \times 10^{-10} \cdot r_{cap}^{1.6}}{3} \right)^{\frac{1}{1.6}} \\ &+ \pi (r_{cap}^2 - r_{stalk}^2) + 2\pi r_{leg} h_{leg} \end{aligned}$$

## 2.2 Capacitance and conductance of the gM $\mu$ E and the junctional membrane

Using impedance measurement of individual gM $\mu$ Es ( $r_{cap} \approx 1.75\mu m$ ,  $h_{cap} \approx 0.5\mu m$ ,  $r_{stalk} \approx 0.75\mu m$ ,  $h_{stalk} \approx 1\mu m$ ) at  $1KHz$  in an ionic solution of 0.9% NaCl, average values of a constant phase element with a resistance of  $3.5M\Omega$  and a capacitance of  $5.1pF$  in series were extracted. Impedance spectrum measurements indicated the pure capacitive characteristics of the gM $\mu$ E with an impedance that follows  $Z \propto \frac{1}{f}$  (where f is the frequency in the range of 1 to 100kHz). Hence the complex nature of the CPE could be neglected for all the relevant frequencies and be presented as a simple passive element. Previous studies have shown the existence of a resistor in parallel to the CPE mentioned above with much greater impedance with respect to the CPE, which also makes it negligible. Using these values and the calculated surface area we extracted a specific capacitance value of the gM $\mu$ E-ionic solution interface of  $65 \frac{\mu F}{cm^2}$  and specific resistivity of  $0.28\Omega cm^2$ . For the specific capacitance of the membrane we used a value of  $1 \frac{\mu F}{cm^2}$ . Recall that different junctional membrane resistivities were applied for the simulations. Both the junctional membrane and the gM $\mu$ E capacitances are obtained by multiplying the suitable specific capacitance by the gM $\mu$ E surface area, whereas the junctional membrane and the gM $\mu$ E resistance are obtained by dividing the suitable specific resistance by the gM $\mu$ E surface area.

**A feasibility study of multi-site, intracellular recordings from mammalian neurons by extracellular gold mushroom-shaped microelectrodes**

Silviya M. Ojovan<sup>1</sup>, Noha Rabieh<sup>1</sup>, Nava Shmoel<sup>1</sup>, Hadas Erez<sup>1</sup>, Eilon Maydan<sup>1</sup>, Ariel Cohen<sup>2</sup> and Micha E. Spira<sup>1\*</sup>

### 2.3 Seal Resistance ( $R_s$ )

The seal resistance formed between the gM $\mu$ E and the membrane of the cell engulfing it (denoted  $R_s$ ) is calculated by adjusting the basic formula of resistance of a cuboid given by-

$$R = \rho \frac{L}{A} \quad (6)$$

where:  $\rho$  - Specific resistance, L - Length of the resistor, A - cross-sectional area through which the electrical current flows.  $R_s$  represents the sum of resistances generated along the surface of a gM $\mu$ E. The following sub-paragraphs deal with the seal resistance generated along the different parts of the gM $\mu$ E.

#### 2.3.1 gM $\mu$ E cap (upper part)

The simulations were conducted for gM $\mu$ E with an ellipsoid shaped cap (**Supplementary Figure 5**). To calculate the electrical resistance formed by the left along the ellipse shaped cap, the path from the top of the cap towards its flat part was divided into infinitesimal summed resistors. To that end, we calculated the value of each infinitesimal resistor surface area through which the current flows and its length. The length element is given by-

$$dl = \sqrt{a^2 \cos^2(t) + b^2 \sin^2(t)} dt \quad (7)$$

For ellipsoid with major semi axis  $a$  and minor semi axis  $b$ . The resistor cross sectional area is given by-

$$A(t) \approx 2\pi d_j a \sin(t) \quad (8)$$

Therefore,

$$R_s = \int_{\theta_0}^{\frac{\pi}{2}} \frac{\sqrt{a^2 \cos^2(t) + b^2 \sin^2(t)}}{2\pi d_j a \sin(t)} dt = \alpha \int_{\theta_0}^{\frac{\pi}{2}} \frac{\sqrt{a^2 \cos^2(t) + b^2 \sin^2(t)}}{a \sin(t)} dt \quad (9)$$

Where:  $\alpha = \frac{1}{2\pi d_j}$ . The value of the integral above (**Supplementary equation. (9)**) grows rapidly as  $\theta_0 \rightarrow 0$ , implying that the seal resistance generated at the top of the cap tends toward infinity. However, assuming a homogeneous distribution of ionic channels across the membrane, the effect of the large resistance at the top of the cap is considerably reduced. In order to normalize this effect, we used a weight function,  $W(t)$ , which represents the ratio between the surface area of the gM $\mu$ E (between the top of the gM $\mu$ E and the differential resistance element) affected by the infinitesimal resistor that is currently summed in the integral, and the surface area of the whole gM $\mu$ E, thus giving a normalized value to the infinitesimal resistor. Supplementary equation (9) then becomes-

$$dR_s = \frac{\sqrt{a^2 \cos^2(t) + b^2 \sin^2(t)}}{2\pi d_j a \sin(t)} W(t) \quad (10)$$

**A feasibility study of multi-site, intracellular recordings from mammalian neurons by extracellular gold mushroom-shaped microelectrodes**

Silviya M. Ojovan<sup>1</sup>, Noha Rabieh<sup>1</sup>, Nava Shmoel<sup>1</sup>, Hadas Erez<sup>1</sup>, Eilon Maydan<sup>1</sup>, Ariel Cohen<sup>2</sup> and Micha E. Spira<sup>1\*</sup>

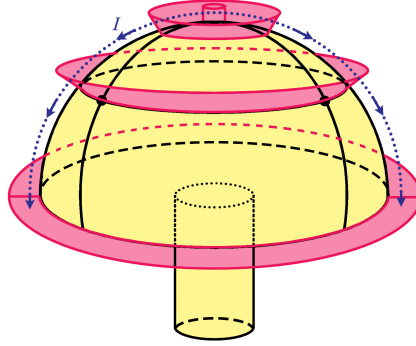

**Supplementary Figure 5.** schematically represents the current flow over the gM $\mu$ E cap (presented in yellow), and the infinitesimal resistive elements (depicted in pink) along the current path towards the cap bottom. I - The current along the gM $\mu$ E cap

### 2.3.2 Disc

Even though the current flows radially both on the bottom of the cap and around the base of the stalk, These are two different cases and therefore the weight function to be used is different.

#### The flat part of the cap

$$dR_s = \rho \frac{dr}{2\pi r d_j} \cdot \frac{\pi (r_{cap}^2 - r^2) + S_{cap}}{S_{jm}} \quad (11)$$

$$\begin{aligned} R_s &= \frac{\alpha}{S_{jm}} \int_{r_{stalk}}^{r_{cap}} \left( \frac{\pi r_{cap}^2 + S_{cap}}{r} - \pi r \right) dr \\ &= \frac{\alpha}{S_{jm}} \left[ \frac{1}{2} \pi (r_{stalk}^2 - r_{cap}^2) + (\pi r_{cap}^2 + S_{cap}) \ln \left( \frac{r_{cap}}{r_{stalk}} \right) \right] \end{aligned} \quad (12)$$

#### Substrate ring around the stalk to which the membrane adhere

$$dR_s = \rho \frac{dr}{2\pi r d_j} \cdot \frac{\pi (r^2 - r_{stalk}^2) + S_{cap} + S_{stalk} + S_{bottom}}{S_{jm}} \quad (13)$$

$$\begin{aligned} R_s &= \frac{\alpha}{S_{jm}} \int_{r_{stalk}}^{r_{cap}} \left( \pi r + (S_{cap} + S_{stalk} + S_{bottom} - \pi r_{stalk}^2) \frac{1}{r} \right) dr \\ &= \frac{\alpha}{S_{jm}} \left[ (S_{cap} + S_{stalk} + S_{bottom} - \pi r_{stalk}^2) \ln \left( \frac{r_{cap}}{r_{stalk}} \right) + \frac{1}{2} \pi (r_{cap}^2 - r_{stalk}^2) \right] \end{aligned} \quad (14)$$

**A feasibility study of multi-site, intracellular recordings from mammalian neurons by extracellular gold mushroom-shaped microelectrodes**

Silviya M. Ojovan<sup>1</sup>, Noha Rabieh<sup>1</sup>, Nava Shmoel<sup>1</sup>, Hadas Erez<sup>1</sup>, Eilon Maydan<sup>1</sup>, Ariel Cohen<sup>2</sup> and Micha E. Spira<sup>1\*</sup>

### 2.3.3 Cylinder

Using the same logic above for the stalk which is cylinder shaped,

$$dR_s = \rho \frac{dh}{2\pi r_{stalk} d_j} \cdot \frac{2\pi r_{stalk} (h_{stalk} - h) + S_{cap} + S_{bottom}}{S_{gM\mu E}} \quad (15)$$

Integration gives-

$$\begin{aligned} R_s &= \frac{\alpha}{S_{jm} r_{stalk}} \int_0^{h_{stalk}} (2\pi h_{stalk} r_{stalk} + S_{cap} + S_{bottom} - 2\pi r_{stalk} h) dh \quad (16) \\ &= \frac{\alpha}{S_{jm} r_{stalk}} \left( (2\pi h_{stalk} r_{stalk} + S_{cap} + S_{bottom}) h - \pi r_{stalk} h^2 \right) \Big|_0^{h_{stalk}} \\ &= \frac{\alpha}{S_{jm} r_{stalk}} \left[ (2\pi r_{stalk} h_{stalk}^2 + S_{cap} h_{stalk} + S_{bottom} h_{stalk}) - \pi r_{stalk} h_{stalk}^2 \right] \\ &= \frac{\alpha}{S_{jm} r_{stalk}} \left[ \pi r_{stalk} h_{stalk}^2 + S_{cap} h_{stalk} + S_{bottom} h_{stalk} \right] \end{aligned}$$

## 3 Partial Engulfment

For the case of partial engulfment of the gM $\mu$ E, values of  $R_{jm}$ ,  $C_{jm}$ ,  $R_e$ ,  $C_e$  and  $R_s$  were calculated as follows: If we denote the values of a fully engulfed gM $\mu$ E by  $R_{jm,0}$ ,  $C_{jm,0}$ ,  $R_{e,0}$ ,  $C_{e,0}$ ,  $R_{s,0}$ , and the fraction of it directly exposed to the bathing solution by  $f$ , than these effective values as function of  $f$  are given by:

$$\begin{aligned} R_{jm} &= \frac{R_{jm,0}}{1-f} \quad (17) \\ R_e &= \frac{R_{e,0}}{1-f} \\ C_{jm} &= C_{jm,0} (1-f) \\ C_e &= C_{e,0} (1-f) \\ R_s &= R_{s,0} (1-f) \end{aligned}$$

and the values of  $R_e^*$ ,  $C_{e,0}^*$ , representing the fraction of the electrode dire and the values of  $R_e^*$ ,  $C_{e,0}^*$ , representing the fraction of the electrode directly facing the bathing solution are given by:

$$\begin{aligned} R_{ef} &= \frac{R_{e,0}}{f} \quad (18) \\ C_{ef} &= R_{e,0} \cdot f \end{aligned}$$

It is important to note that  $R_s$  is considered to be directly proportional to the gM $\mu$ E surface area; i.e., the shape of the gM $\mu$ E is not exactly taken into account, only the percentage of exposure to the solution.



**A feasibility study of multi-site, intracellular recordings from mammalian neurons by extracellular gold mushroom-shaped microelectrodes**

Silviya M. Ojovan<sup>1</sup>, Noha Rabieh<sup>1</sup>, Nava Shmoel<sup>1</sup>, Hadas Erez<sup>1</sup>, Eilon Maydan<sup>1</sup>, Ariel Cohen<sup>2</sup> and Micha E. Spira<sup>1\*</sup>

## 4 References

William D. Callister, David G. Rethwisch. in *Materials Science and Engineering: An Introduction, 8th edn*, Ch. 18.8, 733 (John Wiley, 2010).
